# Supplementary material
Source: publisher figshare collection journal article supplement (https://tandf.figshare.com/articles/dataset/_/963513)
Supplement: Supplementary file 1 [file 1]

ONLINE SUPPLEMENTARY INFORMATION

A new fossil megamouth shark (Lamniformes, Megachasmidae) from the Oligocene–Miocene of the western United States

KENSHU SHIMADA,<sup>\*,1,2</sup> BRUCE J. WELTON,<sup>3</sup> and DOUGLAS J. LONG<sup>4,5</sup>

<sup>1</sup>Department of Environmental Science and Studies and Department of Biological Sciences,  
DePaul University, 2325 North Clifton Avenue, Chicago, Illinois 60614, U.S.A.,  
kshimada@depaul.edu;

<sup>2</sup>Sternberg Museum of Natural History, Fort Hays State University, Hays, Kansas 67601, U.S.A.;

<sup>3</sup>New Mexico Museum of Natural History and Science, 1801 Mountain Road NW, Albuquerque,  
New Mexico 87104, U.S.A., weltonbj@comcast.net;

<sup>4</sup>Department of Biology, St. Mary's College, 1928 St. Mary's Road, Moraga, California 94556,  
U.S.A.

<sup>5</sup>Section of Ichthyology, California Academy of Sciences, 55 Music Concourse Drive, San  
Francisco, California 94118, U.S.A.

APPENDIX 2. Dental measurements (all in millimeters) taken from extant *Megachasma pelagios* taken from illustrations in published literature (number in parentheses indicates estimated value). **Abbreviations** (see also Fig. 6A): **CH**, crown height; **CW**, crown width; **RL**, root length; **RW**, root width.

---

| Specimen         | CH     | CW  | RL  | RW  | Source                                        |
|------------------|--------|-----|-----|-----|-----------------------------------------------|
| BPBM 22730       | 9.0    | 4.0 | 6.6 | 5.8 | Taylor et al. (1983:fig. 8A, C)               |
| LACM 43745-1     | (10.5) | 5.0 | 7.7 | 7.0 | Herman et al. (1993:pls. 45, 48 [top ‘a’])    |
| LACM 43745-1     | (9.5)  | 7.0 | 7.0 | 9.0 | Herman et al. (1993:pls. 45, 48 [top ‘l’])    |
| LACM 43745-1     | (7.0)  | 4.5 | 5.6 | 5.5 | Herman et al. (1993:pls. 45, 48 [top ‘p’])    |
| LACM 43745-1     | (12.0) | 5.5 | 9.1 | 7.5 | Herman et al. (1993:pls. 45, 48 [bottom ‘a’]) |
| LACM 43745-1     | (8.0)  | 5.2 | 8.0 | 7.2 | Herman et al. (1993:pls. 45, 48 [bottom ‘l’]) |
| LACM 43745-1     | (7.0)  | 6.2 | 5.8 | 9.4 | Herman et al. (1993:pls. 45, 48 [bottom ‘p’]) |
| Fukuoka specimen | 3.7    | 1.8 | 2.3 | 2.5 | Yabumoto et al. (1997:fig. 3A)                |
| Fukuoka specimen | 5.1    | 2.6 | 3.5 | 3.6 | Yabumoto et al. (1997:fig. 3B)                |
| Fukuoka specimen | 5.8    | 3.5 | 3.9 | 4.3 | Yabumoto et al. (1997:fig. 3C)                |
| Fukuoka specimen | 5.4    | 3.3 | 3.3 | 4.2 | Yabumoto et al. (1997:fig. 3D)                |
| Fukuoka specimen | 4.3    | 3.2 | 3.0 | 3.7 | Yabumoto et al. (1997:fig. 3E)                |
| Fukuoka specimen | 3.1    | 2.7 | 2.3 | 3.2 | Yabumoto et al. (1997:fig. 3F)                |
| Fukuoka specimen | 5.5    | 2.7 | 3.6 | 3.3 | Yabumoto et al. (1997:fig. 5A)                |
| Fukuoka specimen | 9.4    | 4.0 | 6.5 | 5.6 | Yabumoto et al. (1997:fig. 5B)                |
| Fukuoka specimen | 8.6    | 5.0 | 6.0 | 6.8 | Yabumoto et al. (1997:fig. 5C)                |

|                   |       |     |     |     |                                |
|-------------------|-------|-----|-----|-----|--------------------------------|
| Fukuoka specimen  | 7.0   | 4.1 | 5.1 | 5.0 | Yabumoto et al. (1997:fig. 5D) |
| Fukuoka specimen  | 5.8   | 3.6 | 3.9 | 5.1 | Yabumoto et al. (1997:fig. 5E) |
| Fukuoka specimen  | 4.9   | 3.3 | 3.5 | 4.1 | Yabumoto et al. (1997:fig. 5F) |
| MZB 12906.LLIPI.1 | 1.7   | 1.0 | 1.2 | 1.3 | De Schutter (2009:pl. 11A–D)   |
| MZB 12906.LLIPI.2 | 1.6   | 1.0 | 1.1 | 1.2 | De Schutter (2009:pl. 11E–H)   |
| MZB 12906.LLIPI.3 | 1.7   | 1.0 | 1.1 | 1.2 | De Schutter (2009:pl. 11I–L)   |
| LACM 43745-1      | (8.0) | 6.8 | 7.1 | 6.8 | De Schutter (2009:pl. 11M–R)   |

---
