# Supplementary material
Source: publisher figshare collection journal article supplement (https://tandf.figshare.com/articles/dataset/_/963513)
Supplement: Supplementary file 2 [file 1]

ONLINE SUPPLEMENTARY INFORMATION

A new fossil megamouth shark (Lamniformes, Megachasmidae) from the Oligocene–Miocene of the western United States

KENSHU SHIMADA,<sup>\*,1,2</sup> BRUCE J. WELTON,<sup>3</sup> and DOUGLAS J. LONG<sup>4,5</sup>

<sup>1</sup>Department of Environmental Science and Studies and Department of Biological Sciences,  
DePaul University, 2325 North Clifton Avenue, Chicago, Illinois 60614, U.S.A.,  
kshimada@depaul.edu;

<sup>2</sup>Sternberg Museum of Natural History, Fort Hays State University, Hays, Kansas 67601, U.S.A.;

<sup>3</sup>New Mexico Museum of Natural History and Science, 1801 Mountain Road NW, Albuquerque,  
New Mexico 87104, U.S.A., weltonbj@comcast.net;

<sup>4</sup>Department of Biology, St. Mary's College, 1928 St. Mary's Road, Moraga, California 94556,  
U.S.A.

<sup>5</sup>Section of Ichthyology, California Academy of Sciences, 55 Music Concourse Drive, San  
Francisco, California 94118, U.S.A.

APPENDIX 1. Dental measurements (in millimeters) and other dental characteristics taken from holotype (asterisk) and paratype specimens of *Megachasma applegatei* sp. nov. (number in parentheses indicates estimated value). **Abbreviations** (see also Fig. 6A): **CH**, crown height; **CT**, crown thickness; **CW**, crown width; **G**, nutritive groove dominant; **nDC**, number of distal cusplets (number in quote marks indicates poorly-developed lateral cusplet represented by minute rise of cutting edge); **nMC**, number of mesial lateral cusplets (number in quote marks indicates poorly-developed lateral cusplet represented by minute rise of cutting edge); **P**, nutritive pore(s) dominant; **RL**, root length; **TH**, total tooth height; **TT**, total tooth thickness; **TW**, total tooth width (i.e., equivalent to ‘root width’ [RW]).

| Specimen    | TH    | TW  | TT  | CH    | CW  | CT  | RL  | nMC | nDC | P/G |
|-------------|-------|-----|-----|-------|-----|-----|-----|-----|-----|-----|
| LACM 122130 | 9.6   | 8.4 | 5.6 | 7.6   | 6.5 | 3.4 | 6.3 | 0   | 0   | P   |
| LACM 122132 | 5.8   | 5.3 | 3.3 | 5.0   | 4.5 | 2.5 | 4.3 | ‘1’ | ‘1’ | G   |
| LACM 122133 | 10.1  | 8.7 | 5.6 | 7.3   | 7.4 | 2.8 | 8.3 | 1   | 1   | G   |
| LACM 122134 | 8.2   | 9.4 | 5.3 | 6.6   | 7.1 | 2.4 | 6.0 | 1   | ‘1’ | G   |
| LACM 122135 | 8.3   | 7.2 | 4.2 | 6.5   | 5.9 | 2.6 | 5.1 | 1   | 1   | G   |
| LACM 122136 | 6.0   | 6.1 | 3.8 | 4.5   | 5.1 | 2.0 | 5.0 | 1   | 1   | G   |
| LACM 122137 | 8.5   | 7.8 | 4.0 | 6.9   | 6.6 | 2.6 | 5.3 | ‘1’ | 1   | G   |
| LACM 122138 | 5.6   | 3.7 | 2.3 | 3.3   | 3.3 | 1.0 | 4.3 | 1   | 1   | G   |
| LACM 122139 | 9.6   | 7.6 | 4.6 | 5.9   | 6.0 | 2.7 | 6.6 | 0   | 0   | G   |
| LACM 122140 | 4.8   | 5.6 | 3.1 | 3.6   | 4.6 | 1.7 | 4.5 | 1   | 1   | G   |
| LACM 122141 | 7.1   | 7.1 | 4.3 | 5.3   | 6.5 | 2.5 | 5.5 | 1   | ?   | G   |
| LACM 122142 | 9.0   | 8.2 | 5.0 | 7.3   | 6.8 | 2.9 | 6.2 | ‘2’ | ‘2’ | G   |
| LACM 122143 | (5.5) | 7.0 | 3.4 | (4.3) | 6.2 | 1.7 | 3.6 | ‘2’ | 1   | G   |
| LACM 122145 | 5.7   | 4.7 | 3.1 | 4.7   | 4.3 | 1.9 | 3.9 | 1   | 1   | P   |
| LACM 122146 | 7.9   | 7.8 | 3.9 | 6.0   | 7.1 | 2.3 | 5.3 | 1   | 1   | G   |
| LACM 122147 | 6.3   | 5.8 | 3.4 | 4.5   | 3.3 | 1.7 | 4.5 | 1   | 1   | G   |

|             |       |     |     |       |     |     |     |     |     |       |
|-------------|-------|-----|-----|-------|-----|-----|-----|-----|-----|-------|
| LACM 122148 | 5.7   | 4.6 | 3.4 | 4.3   | 4.0 | 1.9 | 4.5 | 1   | 1   | P     |
| LACM 122149 | 6.5   | 7.1 | 4.2 | 4.3   | 5.1 | 2.1 | 5.1 | 1   | 1   | G     |
| LACM 122150 | 7.6   | 6.6 | 4.6 | 6.0   | 5.2 | 2.3 | 5.6 | 1   | 1   | G     |
| LACM 122151 | 5.1   | 6.3 | 3.5 | 3.7   | 5.4 | 1.3 | 4.5 | '1' | 1   | P     |
| LACM 122153 | 3.4   | 4.1 | 2.1 | 2.5   | 3.4 | 0.9 | 2.5 | 1   | 1   | P     |
| LACM 122154 | (5.8) | 6.9 | 3.8 | (3.9) | 5.6 | 1.7 | 4.3 | 1   | 1   | P     |
| LACM 122155 | 5.5   | 6.0 | 3.5 | 3.5   | 5.4 | 1.9 | 4.7 | 1   | 1   | P     |
| LACM 122156 | 7.0   | 4.7 | 3.8 | 3.4   | 4.0 | 1.6 | 6.0 | 1   | 1   | G     |
| LACM 122157 | 5.6   | 4.3 | 2.5 | 4.4   | 3.9 | 1.7 | 3.8 | 1   | 1   | P     |
| LACM 122158 | 7.7   | 7.6 | 3.9 | 5.8   | 5.7 | 1.9 | 5.5 | 1   | 1   | G     |
| LACM 122159 | 6.6   | 6.5 | 3.7 | 5.0   | 6.2 | 2.0 | 5.0 | 1   | 1   | P     |
| LACM 122160 | 5.1   | 4.9 | 3.1 | 3.8   | 3.2 | 1.9 | 5.0 | '1' | '1' | G     |
| LACM 122161 | 4.7   | 4.6 | 3.0 | 3.6   | 4.1 | 1.7 | 4.3 | 1   | 1   | G     |
| LACM 122162 | (6.0) | 8.9 | 3.5 | 4.5   | 5.7 | 1.1 | 5.5 | 0   | 0   | G     |
| LACM 122163 | 3.5   | 3.9 | 2.3 | 2.6   | 3.2 | 0.9 | 3.4 | 1   | 1   | G     |
| LACM 122164 | 4.6   | 4.4 | 3.1 | 3.8   | 3.7 | 1.6 | 3.1 | 0   | 0   | P     |
| LACM 122165 | 5.8   | 4.7 | 3.0 | 4.6   | 4.4 | 1.4 | 4.2 | 0   | 1   | P     |
| LACM 122166 | 5.3   | 6.7 | 3.1 | 4.1   | 5.6 | 1.8 | 4.8 | 1   | 1   | G     |
| LACM 122167 | 6.2   | 5.6 | 3.9 | 5.1   | 4.7 | 1.5 | 4.7 | 0   | 1   | G(+P) |
| LACM 122168 | 8.2   | 6.6 | 4.5 | 6.4   | 5.5 | 2.0 | 5.9 | 1   | 1   | G     |
| LACM 122169 | 7.0   | 6.7 | 3.8 | 5.1   | 5.8 | 1.9 | 5.0 | 1   | 1   | P     |
| LACM 122170 | 6.8   | 7.3 | 3.8 | 5.2   | 5.6 | 2.4 | 5.1 | 1   | 0   | G     |
| LACM 122171 | 5.8   | 5.4 | 3.4 | 4.5   | 4.6 | 1.7 | 4.4 | 1   | 1   | G     |

|              |       |       |     |       |     |     |     |     |     |   |
|--------------|-------|-------|-----|-------|-----|-----|-----|-----|-----|---|
| LACM 122172  | 6.5   | (6.9) | 3.9 | 5.0   | 5.5 | 2.1 | 4.8 | 1   | 1   | P |
| LACM 122173  | 5.9   | 6.7   | 3.8 | 3.2   | 5.4 | 1.7 | 5.6 | 1   | 0   | G |
| LACM 122174  | 7.8   | 6.6   | 3.9 | 6.0   | 5.8 | 1.9 | 5.6 | 1   | 1   | G |
| LACM 122175  | 5.0   | 4.3   | 2.6 | 3.4   | 3.7 | 1.2 | 4.3 | 1   | 1   | G |
| LACM 122176  | 7.0   | 5.5   | 4.1 | 5.3   | 4.4 | 2.0 | 5.1 | 1   | 1   | G |
| LACM 122177  | 5.6   | 5.5   | 3.4 | 3.8   | 4.6 | 1.2 | 4.8 | 1   | 1   | G |
| LACM 122178  | 5.5   | 7.9   | 3.4 | 4.3   | 6.9 | 1.9 | 3.6 | 1   | 1   | P |
| LACM 122179  | 5.0   | 7.3   | 3.1 | 4.0   | 6.1 | 2.1 | 3.6 | 1   | '2' | P |
| LACM 122181  | (3.6) | 3.3   | 2.3 | (2.8) | 3.1 | 1.0 | 2.8 | 1   | 1   | G |
| LACM 122182  | 5.4   | 4.7   | 3.3 | 4.2   | 3.8 | 1.8 | 4.5 | '1' | 0   | G |
| LACM 122183  | 5.2   | 6.9   | 2.9 | 4.5   | 6.3 | 1.7 | 3.5 | 1   | 1   | P |
| LACM 122184  | 6.1   | 6.0   | 3.7 | 4.8   | 5.0 | 1.8 | 4.3 | '1' | 0   | G |
| LACM 122186  | 7.4   | 7.0   | 4.2 | 5.5   | 5.7 | 2.0 | 6.0 | '1' | 0   | G |
| LACM 122187  | 7.4   | 7.0   | 4.5 | 5.4   | 6.0 | 1.9 | 6.5 | 1   | 1?  | G |
| LACM 122189  | 6.4   | 5.2   | 3.4 | 5.1   | 4.5 | 2.0 | 4.5 | 1   | 1   | P |
| LACM 122190* | 8.6   | 8.3   | 4.3 | 7.0   | 6.6 | 2.2 | 6.1 | 1   | 1   | G |
| LACM 122191  | 6.8   | 6.2   | 3.9 | 4.7   | 5.4 | 2.0 | 5.1 | 0   | 1   | G |
| LACM 122192  | 6.0   | 7.3   | 3.1 | 4.9   | 6.6 | 2.0 | 4.0 | 1   | '1' | P |
| LACM 122193  | 7.3   | 7.4   | 4.6 | 5.4   | 5.8 | 1.8 | 7.3 | '1' | 1   | G |
| LACM 122194  | (5.5) | 5.2   | 4.8 | (4.4) | 4.8 | 1.5 | 5.2 | 1   | 1   | G |
| LACM 122195  | 8.2   | 7.5   | 4.8 | 5.9   | 5.5 | 2.2 | 5.9 | 1   | '1' | G |
| LACM 122196  | 6.7   | 9.3   | 4.3 | 5.1   | 8.2 | 2.0 | 5.5 | 1   | 1   | G |
| LACM 122197  | 14.7  | 10.2  | 9.2 | 12.9  | 8.0 | 3.2 | 8.3 | 0   | 0   | P |

|             |        |       |     |     |     |     |       |     |     |       |
|-------------|--------|-------|-----|-----|-----|-----|-------|-----|-----|-------|
| LACM 122198 | (11.6) | (8.2) | 8.2 | 8.5 | 6.7 | 3.0 | (8.6) | 1   | 1   | G     |
| LACM 122199 | 6.1    | 7.0   | 3.7 | 4.8 | 5.0 | 1.8 | 3.8   | '1' | 0   | P     |
| LACM 122200 | 5.4    | 6.4   | 6.6 | 4.5 | 5.9 | 1.7 | 3.3   | 1   | 1   | G(+P) |
| LACM 122201 | 5.3    | 7.3   | 3.1 | 3.8 | 5.6 | 1.5 | 4.2   | '1' | '1' | G(+P) |
| LACM 122202 | 6.0    | 5.0   | 4.1 | 3.2 | 4.5 | 1.7 | 4.5   | 1   | 0   | G     |

---
